# Supplementary material
Source: publisher figshare collection journal article supplement (https://gsajournals.figshare.com/articles/dataset/_/13272623)
Supplement: Supplementary file 1 [file 1]

## Sheet: Inheritance
missing allele		0
ambiguous allele		999
	ID	CA190				CA344				CA787				CA855				NA398				NA741				NA961				NA1040				VCCJ3				VCCK4				ct78				ct324
mother	A12	257	260	999	999	174	180	999	999	308	314	999	999	253	257	999	999	230	250	999	999	286	288	292	296	207	210	999	999	202	206	226	999	166	181	999	999	189	218	999	999	289	292	295	999	364	418	999	999
father	Ell	260	263	999	999	171	174	177	999	308	314	999	999	253	261	273	277	230	250	999	999	268	302	310	999	204	210	999	999	206	210	999	999	181	999	999	999	191	198	218	257	289	295	999	999	366	412	418	999
offspring	AE01	260	263	999	999	171	174	999	999	308	314	999	999	253	261	277	999	230	250	999	999	292	296	310	999	204	210	999	999	202	210	226	999	181	999	999	999	191	218	257	999	289	295	999	999	364	366	418	999
	AE02	257	260	999	999	174	180	999	999	314	999	999	999	253	257	273	999	230	250	999	999	268	288	292	999	207	210	999	999	202	206	210	999	181	999	999	999	189	198	218	257	292	295	999	999	364	366	418	999
	AE03	257	260	999	999	171	174	177	180	308	314	999	999	253	257	261	277	230	250	999	999	286	296	310	999	207	210	999	999	202	206	210	999	181	999	999	999	189	198	257	999	289	292	295	999	364	366	412	999
	AE04	257	263	999	999	174	999	999	999	308	314	999	999	253	273	999	999	230	999	999	999	268	288	296	999	207	210	999	999	206	210	999	999	166	181	999	999	191	198	218	999	292	295	999	999	364	366	412	999
	AE05	257	260	999	999	171	174	180	999	308	314	999	999	253	257	273	277	230	250	999	999	268	286	292	310	210	999	999	999	206	210	226	999	166	181	999	999	189	218	257	999	292	295	999	999	364	366	412	999
	AE06	257	999	999	999	171	174	999	999	308	314	999	999	253	277	999	999	230	250	999	999	268	288	296	999	204	207	210	999	206	210	226	999	181	999	999	999	198	218	999	999	292	295	999	999	366	412	418	999
	AE07	257	260	263	999	174	180	999	999	308	314	999	999	253	257	273	999	230	250	999	999	288	292	302	310	204	207	210	999	210	226	999	999	181	999	999	999	191	218	999	999	289	292	295	999	364	366	418	999
	AE08	260	263	999	999	171	174	180	999	308	314	999	999	253	257	261	277	230	250	999	999	268	286	292	302	204	207	210	999	206	210	226	999	181	999	999	999	191	198	218	999	289	295	999	999	364	418	999	999
	AE09	260	263	999	999	171	174	999	999	308	314	999	999	253	261	273	277	230	250	999	999	268	288	296	310	204	207	210	999	202	206	210	226	181	999	999	999	189	191	257	999	289	295	999	999	364	366	418	999
	AE10	257	999	999	999	171	174	177	180	308	314	999	999	253	257	277	999	230	250	999	999	292	296	302	310	207	210	999	999	206	210	999	999	181	999	999	999	191	198	218	999	289	295	999	999	364	412	999	999
	AE11	260	263	999	999	171	174	180	999	308	314	999	999	253	257	277	999	230	242	250	999	268	288	292	302	204	207	210	999	206	210	226	999	181	999	999	999	191	218	257	999	292	295	999	999	364	418	999	999
	AE12	257	260	999	999	171	174	999	999	308	314	999	999	253	261	277	999	230	250	999	999	286	296	302	310	204	207	210	999	202	210	999	999	181	999	999	999	189	198	218	999	289	295	999	999	364	418	999	999
	AE13	257	260	999	999	171	174	999	999	308	314	999	999	253	261	277	999	230	250	999	999	286	296	302	999	204	207	210	999	202	206	210	999	181	999	999	999	191	218	999	999	289	292	295	999	364	412	418	999
	AE14	257	260	999	999	171	174	177	180	308	314	999	999	253	257	277	999	230	250	999	999	288	292	302	310	204	207	210	999	206	210	999	999	166	181	999	999	189	198	218	999	289	292	295	999	364	366	418	999
	AE15	257	260	263	999	174	180	999	999	308	314	999	999	253	257	273	999	230	999	999	999	268	288	292	302	207	210	999	999	202	206	210	999	181	999	999	999	189	198	218	257	295	999	999	999	364	366	412	999
	AE16	257	260	263	999	171	174	177	999	314	999	999	999	253	261	277	999	230	250	999	999	288	292	310	999	207	210	999	999	202	210	999	999	181	999	999	999	191	218	257	999	289	292	295	999	366	412	418	999
	AE17	257	260	263	999	174	177	999	999	308	999	999	999	253	257	273	999	230	250	999	999	268	286	296	310	204	207	210	999	206	999	999	999	181	999	999	999	191	218	257	999	289	292	295	999	364	418	999	999
	AE18	257	260	263	999	174	177	999	999	308	314	999	999	253	261	273	999	230	250	999	999	288	296	302	310	207	210	999	999	202	206	210	999	181	999	999	999	189	191	218	257	289	292	295	999	364	418	999	999
	AE19	257	263	999	999	174	177	999	999	308	999	999	999	253	261	273	999	230	250	999	999	288	292	302	999	204	207	210	999	206	210	999	999	166	181	999	999	189	191	198	218	289	292	295	999	364	418	999	999
	AE20	257	999	999	999	171	174	180	999	314	999	999	999	257	261	277	999	230	250	999	999	292	296	310	999	204	210	999	999	202	206	210	999	166	181	999	999	189	191	198	218	295	999	999	999	364	412	418	999
	AE21	257	260	263	999	171	174	999	999	308	314	999	999	253	277	999	999	250	999	999	999	286	288	302	310	207	210	999	999	202	210	999	999	166	181	999	999	189	198	218	999	292	295	999	999	364	412	999	999
	AE22	257	260	999	999	174	999	999	999	308	314	999	999	253	261	999	999	250	999	999	999	268	286	288	999	207	210	999	999	206	210	226	999	181	999	999	999	189	191	218	999	289	292	295	999	366	412	418	999
	AE23	257	260	999	999	171	174	180	999	314	999	999	999	247	253	257	277	230	999	999	999	268	292	296	999	204	210	999	999	202	206	999	999	181	999	999	999	189	191	198	218	292	295	999	999	364	366	412	999
	AE24	257	260	263	999	171	174	180	999	308	314	999	999	253	257	277	999	230	250	999	999	268	288	296	310	207	210	999	999	210	226	999	999	181	999	999	999	189	218	257	999	289	295	999	999	364	366	418	999
	AE25	257	260	999	999	174	177	999	999	308	314	999	999	253	261	273	999	230	250	999	999	288	296	302	999	207	210	999	999	202	210	226	999	166	181	999	999	189	191	218	999	289	292	295	999	364	366	412	999
	AE26	257	999	999	999	174	177	180	999	314	999	999	999	253	257	273	999	230	250	999	999	268	288	296	302	207	210	999	999	202	210	999	999	166	181	999	999	189	191	218	257	289	292	295	999	364	412	999	999
	AE27	257	260	999	999	174	180	999	999	308	314	999	999	253	257	277	999	230	250	999	999	268	286	296	999	204	207	210	999	202	206	999	999	181	999	999	999	189	198	257	999	295	999	999	999	364	366	418	999
	AE28	257	260	999	999	171	174	180	999	308	314	999	999	253	257	277	999	230	250	999	999	268	292	296	999	207	210	999	999	210	226	999	999	181	999	999	999	189	191	218	257	292	295	999	999	364	366	412	418
	AE29	257	263	999	999	171	174	180	999	308	314	999	999	253	257	277	999	230	250	999	999	286	288	302	999	204	210	999	999	202	206	210	226	181	999	999	999	189	191	218	257	289	295	999	999	364	366	418	999
	AE30	257	999	999	999	171	174	999	999	308	314	999	999	253	261	277	999	230	250	999	999	292	296	310	999	204	207	210	999	202	206	226	999	181	999	999	999	191	218	257	999	289	295	999	999	364	366	418	999
mother	A246	257	999	999	999	171	174	180	999	308	314	320	999	247	253	255	999	230	242	250	999	266	306	310	999	207	210	999	999	200	202	204	232	148	160	166	999	191	208	240	251	289	295	999	999	364	366	402	418
father	M36	257	260	999	999	174	180	999	999	308	314	999	999	255	261	269	277	246	250	999	999	266	282	296	310	207	210	999	999	202	204	206	210	160	999	999	999	191	200	251	999	286	295	999	999	366	402	418	999
offspring	AM01	257	999	999	999	171	174	180	999	308	314	999	999	247	253	255	261	230	242	246	250	266	282	296	999	207	210	999	999	200	206	210	232	160	999	999	999	191	251	999	999	286	289	295	999	364	366	402	418
	AM02	257	999	999	999	171	174	180	999	314	320	999	999	247	253	255	277	230	250	999	999	266	282	306	310	207	210	999	999	202	204	206	210	148	160	166	999	191	251	999	999	295	999	999	999	364	366	402	999
	AM03	260	999	999	999	174	180	999	999	308	314	999	999	253	255	277	999	242	246	250	999	266	282	310	999	210	999	999	999	202	206	232	999	148	160	166	999	208	240	251	999	289	295	999	999	366	402	418	999
	AM04	257	260	999	999	171	174	180	999	308	314	999	999	247	255	277	999	230	242	246	250	266	296	310	999	207	210	999	999	200	202	210	232	148	160	166	999	191	251	999	999	295	999	999	999	366	402	999	999
	AM05	257	999	999	999	174	180	999	999	308	314	320	999	255	261	277	999	230	250	999	999	282	306	310	999	207	210	999	999	200	202	210	232	148	160	166	999	191	200	208	240	286	295	999	999	364	366	402	999
	AM06	257	260	999	999	174	180	999	999	314	320	999	999	253	255	261	999	230	250	999	999	266	310	999	999	207	210	999	999	202	204	210	999	160	999	999	999	191	200	208	240	286	289	295	999	364	366	402	418
	AM07	260	999	999	999	174	180	999	999	308	314	320	999	255	269	277	999	230	242	250	999	266	282	296	306	207	210	999	999	202	204	206	210	160	999	999	999	191	240	251	999	286	295	999	999	364	366	402	999
	AM08	257	260	999	999	171	174	180	999	308	314	320	999	247	253	255	269	246	250	999	999	296	306	310	999	207	210	999	999	200	202	206	232	148	160	166	999	191	200	208	251	289	295	999	999	364	402	418	999
	AM09	257	260	999	999	174	180	999	999	308	314	320	999	253	255	269	999	246	250	999	999	266	296	306	999	207	210	999	999	202	204	210	232	160	999	999	999	191	200	240	251	295	999	999	999	364	366	402	999
	AM10	257	999	999	999	171	174	999	999	308	314	320	999	247	253	261	277	230	246	250	999	282	296	310	999	207	210	999	999	200	202	999	999	148	160	166	999	191	240	251	999	286	289	295	999	366	418	999	999
	AM11	257	260	999	999	174	180	999	999	308	314	999	999	255	277	999	999	230	242	250	999	266	306	310	999	207	210	999	999	200	204	206	999	160	999	999	999	191	208	240	999	295	999	999	999	364	366	418	999
	AM12	257	999	999	999	174	180	999	999	308	314	999	999	255	261	277	999	230	242	250	999	296	310	999	999	207	210	999	999	200	202	210	232	160	999	999	999	191	200	240	999	286	295	999	999	366	402	418	999
	AM13	257	999	999	999	171	174	999	999	308	314	320	999	253	255	261	277	230	246	250	999	282	296	310	999	210	999	999	999	200	202	204	206	160	999	999	999	191	240	251	999	286	289	295	999	366	402	418	999
	AM14	257	260	999	999	174	180	999	999	314	320	999	999	253	255	261	277	246	250	999	999	282	296	306	310	207	210	999	999	200	202	206	232	160	999	999	999	191	208	240	251	286	289	295	999	364	366	402	999
	AM15	260	999	999	999	171	174	180	999	314	320	999	999	247	255	277	999	230	242	250	999	266	296	306	999	207	210	999	999	200	202	206	232	148	160	166	999	191	208	251	999	286	295	999	999	364	366	402	999
	AM16	257	999	999	999	171	180	999	999	314	999	999	999	247	255	261	999	230	250	999	999	266	282	296	310	207	210	999	999	202	204	210	232	148	160	166	999	191	200	208	251	286	295	999	999	366	418	999	999
	AM17	257	260	999	999	174	999	999	999	314	320	999	999	247	253	261	277	250	999	999	999	282	296	310	999	210	999	999	999	206	210	232	999	148	160	166	999	191	200	240	251	289	295	999	999	364	418	999	999
	AM18	257	999	999	999	174	180	999	999	308	314	999	999	255	269	999	999	230	250	999	999	266	282	310	999	207	210	999	999	204	206	210	232	160	999	999	999	191	240	999	999	295	999	999	999	366	402	418	999
	AM19	257	260	999	999	174	999	999	999	308	314	999	999	255	269	999	999	242	250	999	999	282	296	310	999	207	210	999	999	200	202	206	999	148	160	166	999	191	251	999	999	289	295	999	999	364	402	418	999
	AM20	257	260	999	999	171	174	180	999	308	314	999	999	247	255	269	999	246	250	999	999	266	282	296	999	210	999	999	999	202	206	210	232	148	160	166	999	191	200	251	999	289	295	999	999	366	402	418	999
	AM21	257	999	999	999	171	174	180	999	308	314	320	999	247	255	277	999	230	242	246	250	296	306	310	999	207	210	999	999	200	202	206	232	160	999	999	999	191	200	208	999	286	295	999	999	364	366	402	418
	AM22	257	999	999	999	174	180	999	999	308	314	320	999	253	255	277	999	230	250	999	999	282	296	310	999	210	999	999	999	200	202	204	999	160	999	999	999	191	240	251	999	289	295	999	999	364	366	402	418
	AM23	257	999	999	999	171	174	180	999	314	999	999	999	247	253	255	261	230	242	250	999	282	306	310	999	207	210	999	999	200	202	204	999	160	999	999	999	191	251	999	999	286	289	295	999	366	418	999	999
	AM24	257	999	999	999	174	180	999	999	308	314	320	999	253	255	261	999	230	246	250	999	282	296	306	310	207	210	999	999	202	204	206	232	148	160	166	999	191	240	999	999	286	289	295	999	364	366	402	999
	AM25	257	999	999	999	171	174	180	999	308	314	320	999	247	255	261	277	242	250	999	999	266	282	310	999	207	210	999	999	200	202	206	999	160	999	999	999	191	200	208	999	286	295	999	999	364	366	402	418
	AM26	257	999	999	999	171	180	999	999	308	314	999	999	247	255	261	999	246	250	999	999	282	296	306	999	210	999	999	999	200	204	206	232	148	160	166	999	191	200	208	251	286	295	999	999	366	402	418	999
	AM27	257	999	999	999	174	180	999	999	314	320	999	999	253	255	261	277	246	250	999	999	266	306	310	999	207	210	999	999	200	202	204	210	148	160	166	999	191	208	251	999	286	289	295	999	364	366	402	999
	AM28	257	260	999	999	174	180	999	999	314	999	999	999	247	255	269	999	246	250	999	999	266	282	296	306	207	210	999	999	200	202	204	206	148	160	166	999	191	208	251	999	295	999	999	999	366	402	999	999
	AM29	257	260	999	999	171	174	180	999	308	314	999	999	247	255	277	999	242	250	999	999	266	282	310	999	207	210	999	999	200	202	210	232	148	160	166	999	191	250	251	999	295	999	999	999	364	366	402	999
mother	A246	257	999	999	999	171	174	180	999	308	314	320	999	247	253	255	999	230	242	250	999	266	306	310	999	207	210	999	999	200	202	204	232	148	160	166	999	191	208	240	251	289	295	999	999	364	366	402	418
father	Duke	257	263	999	999	174	180	999	999	308	317	999	999	255	257	261	277	242	250	999	999	282	288	310	999	204	207	210	999	202	204	206	210	160	163	999	999	189	198	208	257	289	295	999	999	366	412	999	999
offspring	AD01	257	263	999	999	174	180	999	999	308	314	999	999	253	255	257	999	230	242	250	999	288	310	999	999	204	207	210	999	200	202	204	210	148	163	166	999	189	191	198	251	295	999	999	999	364	412	418	999
	AD02	257	263	999	999	174	180	999	999	308	320	999	999	253	255	257	261	230	242	250	999	266	288	310	999	204	207	210	999	202	204	210	999	160	163	999	999	189	191	240	257	289	295	999	999	364	412	418	999
	AD03	257	263	999	999	171	174	999	999	308	314	317	999	247	253	257	261	242	250	999	999	266	288	310	999	204	207	210	999	202	204	210	999	148	160	163	166	189	191	251	257	289	295	999	999	364	366	418	999
	AD04	257	999	999	999	171	174	999	999	308	314	317	999	247	253	255	277	230	242	999	999	310	999	999	999	204	207	210	999	200	202	210	999	160	163	999	999	189	191	198	208	289	295	999	999	366	402	412	999
	AD05	263	999	999	999	171	174	180	999	308	314	320	999	247	255	257	261	230	242	250	999	266	288	306	310	210	999	999	999	202	204	999	999	160	163	999	999	189	191	198	208	289	295	999	999	364	366	412	999
	AD06	257	999	999	999	174	180	999	999	308	314	317	999	253	255	277	999	230	242	250	999	266	282	306	999	207	210	999	999	200	204	206	999	148	160	163	166	198	208	240	251	289	295	999	999	366	412	418	999
	AD07	263	999	999	999	171	174	180	999	308	317	320	999	247	255	261	999	230	242	250	999	282	306	310	999	207	210	999	999	200	202	210	999	160	163	999	999	189	208	240	257	289	295	999	999	366	412	418	999
	AD08	257	263	999	999	174	180	999	999	308	314	317	999	253	255	261	999	230	242	250	999	310	999	999	999	204	210	999	999	200	204	206	232	160	163	999	999	208	240	257	999	289	295	999	999	366	402	418	999
	AD09	257	263	999	999	171	174	180	999	308	314	999	999	247	255	277	999	230	242	250	999	266	282	310	999	207	210	999	999	204	206	232	999	148	160	163	166	208	240	251	999	289	295	999	999	366	412	418	999
	AD10	263	999	999	999	171	180	999	999	308	314	999	999	247	255	277	999	230	242	250	999	310	999	999	999	204	210	999	999	200	206	210	232	160	163	999	999	198	240	251	257	295	999	999	999	366	402	999	999
	AD11	257	263	999	999	174	180	999	999	308	317	999	999	255	257	261	999	242	250	999	999	310	999	999	999	210	999	999	999	202	210	232	999	148	160	163	166	189	191	208	999	289	295	999	999	364	402	412	999
	AD12	257	263	999	999	180	999	999	999	308	314	320	999	255	257	277	999	242	250	999	999	282	306	310	999	204	207	210	999	202	204	999	999	148	160	163	166	189	191	208	257	289	295	999	999	364	366	402	412
	AD13	257	263	999	999	174	180	999	999	308	314	999	999	255	257	261	999	242	250	999	999	282	288	310	999	210	999	999	999	202	206	232	999	160	999	999	999	189	208	240	999	289	295	999	999	402	418	999	999
	AD14	257	999	999	999	180	999	999	999	308	999	999	999	255	257	277	999	242	250	999	999	266	288	310	999	210	999	999	999	200	202	210	999	148	160	163	166	189	208	240	251	289	295	999	999	402	412	418	999
	AD15	263	999	999	999	174	180	999	999	308	314	999	999	253	255	277	999	230	242	250	999	282	288	306	999	204	207	210	999	202	204	210	232	148	160	163	166	198	208	251	257	289	295	999	999	366	402	999	999
	AD16	257	263	999	999	171	174	180	999	308	314	317	999	247	255	261	999	230	242	250	999	288	306	310	999	204	207	210	999	200	202	206	210	160	999	999	999	198	208	251	999	289	295	999	999	364	366	999	999
	AD17	257	263	999	999	174	180	999	999	308	320	999	999	255	261	277	999	230	242	250	999	310	999	999	999	204	210	999	999	202	206	232	999	160	999	999	999	198	208	251	999	289	295	999	999	364	402	999	999
	AD18	257	263	999	999	171	174	180	999	308	314	999	999	247	255	261	999	230	242	250	999	266	310	999	999	204	210	999	999	202	204	206	210	160	163	999	999	191	198	208	251	289	295	999	999	366	402	412	999
	AD19	257	263	999	999	174	180	999	999	308	314	999	999	255	257	261	999	230	242	250	999	266	310	999	999	204	207	210	999	200	202	210	999	148	160	163	166	191	198	240	257	289	295	999	999	366	412	418	999
	AD20	257	999	999	999	174	180	999	999	308	317	999	999	253	255	261	999	230	242	250	999	266	310	999	999	207	210	999	999	202	204	210	999	160	999	999	999	189	191	208	240	289	295	999	999	364	366	999	999
	AD21	263	999	999	999	174	180	999	999	308	314	999	999	255	257	261	999	230	242	250	999	310	999	999	999	207	210	999	999	200	206	210	232	160	999	999	999	189	198	240	251	289	295	999	999	364	366	999	999
	AD22	257	999	999	999	171	174	180	999	308	314	320	999	247	255	257	277	242	250	999	999	282	288	306	999	207	210	999	999	200	204	210	232	160	163	999	999	189	191	198	208	295	999	999	999	364	366	402	999
	AD23	257	999	999	999	171	180	999	999	308	314	317	320	247	255	257	277	242	250	999	999	266	310	999	999	204	207	210	999	200	202	210	999	148	163	166	999	189	191	198	208	295	999	999	999	364	366	418	999
	AD24	257	263	999	999	171	174	180	999	308	320	999	999	247	253	257	261	230	242	250	999	266	310	999	999	204	210	999	999	206	206	232	999	148	160	166	999	191	198	208	999	289	295	999	999	364	418	999	999
	AD25	257	999	999	999	171	174	180	999	308	314	317	999	247	253	257	261	230	242	999	999	266	282	306	310	204	207	210	999	204	206	232	999	160	999	999	999	189	191	240	257	289	295	999	999	402	412	418	999
mother	BC	257	999	999	999	171	174	180	186	305	308	317	320	253	255	273	999	230	250	999	999	266	288	292	310	207	210	213	999	202	210	226	232	160	181	999	999	189	198	218	251	289	295	999	999	364	366	418	999
father	Ell	260	263	999	999	171	174	177	999	308	314	999	999	253	261	273	277	230	250	999	999	268	302	310	999	204	210	999	999	206	210	999	999	181	999	999	999	191	198	218	257	289	295	999	999	366	412	418	999
offspring	BE01	257	263	999	999	174	177	180	186	314	317	320	999	253	255	277	999	230	250	999	999	268	292	310	999	204	207	210	213	206	210	226	232	181	999	999	999	191	198	218	999	295	999	999	999	364	366	412	418
	BE02	257	260	999	999	171	174	180	999	305	314	320	999	253	255	273	277	230	250	999	999	288	302	310	999	207	210	999	999	210	226	232	999	160	163	181	999	189	198	218	257	289	295	999	999	366	418	999	999
	BE03	257	263	999	999	171	174	177	180	308	314	317	320	253	255	277	999	230	250	999	999	288	292	302	999	207	210	213	999	206	210	226	999	181	999	999	999	189	218	257	999	289	295	999	999	364	412	418	999
	BE04	257	260	999	999	171	174	180	999	308	314	320	999	253	255	261	273	230	250	999	999	268	288	310	999	210	213	999	999	202	206	210	999	160	163	181	999	198	218	257	999	295	999	999	999	364	412	418	999
	BE05	257	263	999	999	171	174	186	999	305	308	314	317	253	273	999	999	230	250	999	999	288	302	310	999	210	213	999	999	202	206	210	999	181	999	999	999	189	191	218	257	289	295	999	999	366	412	418	999
	BE06	257	260	263	999	174	186	999	999	305	314	320	999	253	277	999	999	230	250	999	999	288	302	310	999	204	210	213	999	202	206	210	226	163	181	999	999	191	198	218	999	289	295	999	999	366	412	418	999
	BE07	257	260	999	999	174	177	180	999	305	308	314	999	253	261	273	999	230	250	999	999	288	292	302	999	210	213	999	999	210	232	999	999	181	999	999	999	189	218	251	257	289	295	999	999	366	418	999	999
	BE08	257	263	999	999	171	174	180	999	305	308	314	999	253	255	261	273	230	250	999	999	266	268	288	302	204	210	213	999	210	232	999	999	160	181	999	999	189	218	257	999	295	999	999	999	364	366	412	418
	BE09	257	263	999	999	171	174	177	180	305	308	314	999	253	255	273	999	250	999	999	999	292	302	310	999	204	210	213	999	206	226	232	999	160	163	181	999	191	198	218	251	289	295	999	999	364	366	412	418
	BE10	257	260	263	999	171	174	177	180	314	317	320	999	253	277	999	999	230	250	999	999	268	288	310	999	204	210	213	999	210	226	999	999	160	163	181	999	191	191	218	999	289	295	999	999	366	412	418	999
	BE11	257	263	999	999	171	174	180	999	305	308	314	999	253	255	277	999	230	250	999	999	288	292	310	999	207	210	213	999	202	206	210	232	160	181	999	999	198	218	251	999	295	999	999	999	366	418	999	999
	BE12	257	260	999	999	171	174	999	999	305	308	314	999	255	273	277	999	230	250	999	999	268	288	292	302	204	207	210	213	210	226	999	999	160	163	181	999	198	218	257	999	289	295	999	999	366	412	418	999
	BE13	257	260	999	999	171	174	177	186	305	308	314	999	253	273	999	999	250	999	999	999	268	288	310	999	210	213	999	999	210	226	232	999	163	181	999	999	191	198	218	999	289	295	999	999	366	412	418	999
	BE14	257	260	263	999	171	174	180	999	305	314	317	999	253	261	277	999	230	250	999	999	268	292	310	999	204	207	210	213	202	210	999	999	163	181	999	999	191	198	251	999	295	999	999	999	364	366	999	999
	BE15	257	260	999	999	171	174	177	186	305	308	314	999	253	255	277	999	230	250	999	999	292	310	999	999	210	213	999	999	202	210	226	999	181	999	999	999	218	251	257	999	289	295	999	999	366	412	418	999
	BE16	257	263	999	999	171	174	186	999	308	314	317	320	261	273	999	999	230	250	999	999	292	310	999	999	204	210	213	999	202	206	210	232	163	181	999	999	191	218	251	999	289	295	999	999	366	418	999	999
	BE17	257	263	999	999	171	174	999	999	305	308	314	317	253	273	999	999	230	250	999	999	266	310	999	999	210	213	999	999	202	206	226	999	160	163	181	999	191	198	251	999	295	999	999	999	364	418	999	999
	BE18	257	260	999	999	171	174	177	180	305	314	317	999	253	277	999	999	230	250	999	999	268	288	292	999	204	210	213	999	206	210	226	999	160	181	999	999	189	198	218	251	289	295	999	999	366	412	418	999
	BE19	257	260	999	999	174	177	180	999	305	308	314	317	255	261	273	999	230	250	999	999	268	292	310	999	210	213	999	999	206	210	226	999	160	181	999	999	191	198	218	999	289	295	999	999	366	418	999	999
	BE20	257	263	999	999	171	174	177	999	305	314	320	999	253	261	273	999	230	250	999	999	288	292	310	999	204	210	213	999	202	210	999	999	160	163	181	999	191	198	218	999	289	295	999	999	366	412	418	999
	BE21	257	999	999	999	171	174	186	999	305	308	314	317	253	261	277	999	230	250	999	999	268	288	302	310	204	207	210	213	202	206	210	999	181	999	999	999	189	198	218	999	295	999	999	999	364	366	412	418
	BE22	257	260	263	999	171	174	177	999	305	308	314	320	253	261	273	999	230	250	999	999	266	302	310	999	204	207	210	999	202	210	232	999	160	181	999	999	191	198	218	251	289	295	999	999	366	412	418	999
	BE23	257	263	999	999	171	174	177	186	305	314	320	999	253	273	999	999	230	250	999	999	288	292	302	999	204	207	210	213	210	226	999	999	160	163	999	999	189	198	257	999	289	295	999	999	364	366	418	999
	BE24	257	263	999	999	174	177	186	999	305	314	317	999	253	277	999	999	230	250	999	999	266	288	310	999	210	213	999	999	206	210	226	232	160	163	181	999	191	218	251	999	289	295	999	999	364	366	412	418
	BE25	257	260	263	999	171	174	180	999	314	317	320	999	253	273	999	999	230	250	999	999	266	302	310	999	204	207	210	999	202	210	232	999	163	181	999	999	191	198	218	999	289	295	999	999	364	366	418	999
	BE26	257	260	999	999	174	177	180	186	305	308	314	317	253	255	277	999	230	250	999	999	288	292	310	999	210	213	999	999	206	226	232	999	160	163	181	999	189	198	218	999	289	295	999	999	366	412	999	999
	BE27	257	263	999	999	171	174	180	999	314	317	320	999	253	255	273	999	230	250	999	999	266	292	310	999	204	207	210	999	202	210	999	999	181	999	999	999	191	198	218	999	289	295	999	999	366	412	418	999
	BE28	257	263	999	999	171	174	177	186	305	314	317	999	255	261	273	999	230	250	999	999	266	288	302	310	210	213	999	999	206	210	226	999	181	999	999	999	189	198	218	999	289	295	999	999	364	366	412	418
	BE29	257	263	999	999	174	177	180	999	314	317	320	999	253	255	261	273	230	250	999	999	288	292	310	999	204	210	213	999	206	210	232	999	181	999	999	999	191	198	251	257	289	295	999	999	364	366	418	999
mother	Draper	257	260	263	999	171	174	180	999	308	314	317	999	259	261	277	999	242	250	254	999	282	288	292	999	204	207	210	999	202	206	214	999	163	181	999	999	189	198	251	257	286	289	295	999	366	999	999	999
father	A12	257	260	999	999	174	180	999	999	308	314	999	999	253	257	999	999	230	250	999	999	286	288	292	296	207	210	999	999	202	206	226	999	166	181	999	999	189	218	999	999	289	292	295	999	364	418	999	999
offspring	DA01	257	999	999	999	171	174	999	999	308	314	317	999	253	259	261	999	230	250	999	999	286	292	296	999	204	207	999	999	202	206	226	999	163	181	999	999	189	257	999	999	286	289	292	295	366	418	999	999
	DA02	257	263	999	999	171	174	999	999	314	317	999	999	253	259	999	999	230	250	254	999	286	288	999	999	207	210	999	999	202	226	999	999	181	999	999	999	189	198	218	999	286	289	295	999	364	999	999	999
	DA03	257	260	263	999	171	174	180	999	308	314	317	999	253	257	259	999	230	242	250	999	288	292	296	999	204	207	210	999	202	206	214	999	163	166	999	999	189	198	218	251	286	289	295	999	364	366	999	999
	DA04	257	260	999	999	171	174	999	999	308	314	999	999	253	259	277	999	230	242	250	999	286	292	296	999	207	210	999	999	202	206	226	999	163	166	181	999	189	218	257	999	286	289	295	999	366	418	999	999
	DA05	257	260	263	999	171	174	180	999	308	314	317	999	253	257	277	999	230	250	254	999	282	286	288	292	204	207	210	999	202	214	226	999	163	166	999	999	189	218	251	999	289	292	295	999	364	366	418	999
	DA06	257	260	999	999	171	174	999	999	308	314	999	999	253	259	277	999	230	250	254	999	288	292	296	999	207	210	999	999	202	206	226	999	163	166	999	999	189	198	218	257	286	289	292	295	364	418	999	999
	DA07	257	260	999	999	171	174	180	999	308	314	999	999	253	257	261	999	230	250	254	999	288	292	296	999	204	207	210	999	202	206	226	999	163	166	999	999	189	218	257	999	286	289	295	999	366	418	999	999
	DA08	257	260	263	999	174	999	999	999	308	314	999	999	253	261	277	999	230	242	254	999	286	288	999	999	207	210	999	999	206	214	226	999	163	181	999	999	189	198	218	251	289	292	295	999	364	366	999	999
	DA09	257	260	263	999	174	999	999	999	308	314	317	999	253	261	277	999	230	242	250	999	282	288	292	999	204	207	210	999	202	206	214	999	163	166	181	999	189	218	257	999	289	295	999	999	364	366	999	999
	DA10	257	260	263	999	174	180	999	999	308	314	317	999	253	257	261	999	230	250	254	999	282	288	292	999	204	207	210	999	202	206	226	999	163	166	181	999	189	198	218	999	289	295	999	999	366	418	999	999
	DA11	257	260	999	999	174	180	999	999	308	314	317	999	253	257	277	999	230	242	250	999	286	292	999	999	204	207	999	999	202	206	214	999	163	181	999	999	189	198	218	251	289	295	999	999	364	366	418	999
	DA12	260	999	999	999	174	999	999	999	308	314	317	999	253	261	999	999	230	242	250	999	282	286	292	296	207	210	999	999	202	999	999	999	181	999	999	999	198	218	251	999	289	295	999	999	364	366	999	999
	DA13	257	260	999	999	174	999	999	999	308	314	317	999	257	261	277	999	230	250	999	999	286	292	296	999	207	210	999	999	202	206	214	226	163	166	999	999	189	198	218	999	289	295	999	999	364	366	999	999
	DA14	257	263	999	999	171	174	999	999	308	314	317	999	253	259	277	999	230	250	999	999	286	292	296	999	204	207	210	999	206	214	226	999	181	999	999	999	189	218	251	257	286	289	292	295	364	366	999	999
	DA15	257	260	999	999	171	174	180	999	308	314	317	999	253	259	999	999	230	250	254	999	286	288	999	999	207	210	999	999	202	206	226	999	163	181	999	999	189	198	218	251	286	289	292	295	364	418	999	999
	DA16	257	999	999	999	174	180	999	999	314	999	999	999	253	261	999	999	230	250	254	999	282	286	292	296	210	999	999	999	202	214	999	999	163	181	999	999	189	218	257	999	289	292	295	999	364	366	999	999
	DA17	260	999	999	999	174	999	999	999	308	317	999	999	253	257	277	999	230	250	254	999	282	286	292	296	204	210	999	999	202	214	226	999	163	166	181	999	189	191	218	251	289	295	999	999	364	366	418	999
	DA18	257	260	999	999	171	174	999	999	314	999	999	999	253	261	999	999	230	250	254	999	288	292	999	999	207	210	999	999	202	206	226	999	181	999	999	999	189	198	218	999	286	289	295	999	364	366	999	999
	DA19	257	260	999	999	171	174	180	999	308	314	999	999	253	277	999	999	230	242	250	999	282	288	292	999	204	210	999	999	202	206	214	226	163	166	181	999	189	218	257	999	286	289	295	999	364	366	418	999
	DA20	257	260	263	999	171	174	999	999	314	317	999	999	253	259	261	999	230	250	254	999	282	288	296	999	207	210	999	999	202	214	226	999	163	166	181	999	189	198	218	999	286	289	999	999	364	366	999	999
	DA21	257	260	999	999	171	174	999	999	308	314	317	999	253	259	261	277	230	242	250	999	286	292	296	999	207	210	999	999	202	206	999	999	163	166	181	999	189	218	257	999	286	289	295	999	364	366	999	999
	DA22	260	263	999	999	171	174	180	999	308	314	317	999	257	259	261	999	230	250	254	999	286	288	292	999	207	210	999	999	202	206	226	999	166	181	999	999	189	218	257	999	286	289	999	999	364	366	418	999
	DA23	257	260	263	999	174	180	999	999	308	314	999	999	253	257	277	999	230	250	254	999	286	288	292	999	204	207	210	999	202	206	226	999	163	166	181	999	189	198	999	999	289	292	295	999	364	366	999	999
	DA24	257	260	999	999	174	999	999	999	308	314	317	999	253	261	277	999	230	250	254	999	282	288	292	999	204	207	999	999	202	206	226	999	163	181	999	999	189	198	218	257	289	292	295	999	364	366	418	999
	DA25	257	263	999	999	174	180	999	999	308	314	999	999	253	257	261	277	230	250	254	999	282	288	296	999	204	207	210	999	202	206	226	999	163	181	999	999	189	218	257	999	289	292	295	999	364	366	418	999
	DA26	257	263	999	999	174	180	999	999	308	314	999	999	253	257	261	277	230	242	250	999	286	288	292	296	204	207	210	999	202	206	214	999	163	166	999	999	189	251	999	999	289	292	295	999	364	366	999	999
	DA27	257	260	263	999	171	174	999	999	308	314	999	999	253	259	277	999	230	242	250	999	282	286	296	999	207	210	999	999	202	206	226	999	163	166	999	999	189	218	257	999	286	289	292	295	364	366	999	999
	DA28	257	263	999	999	174	180	999	999	314	317	999	999	253	259	277	999	230	250	254	999	288	292	999	999	207	210	999	999	202	206	214	226	166	181	999	999	189	198	218	999	289	292	295	999	364	366	418	999
	DA29	257	260	999	999	171	174	999	999	308	314	999	999	253	259	261	999	230	250	254	999	282	288	292	296	207	210	999	999	206	214	226	999	166	181	999	999	189	218	257	999	286	289	292	295	364	366	418	999
	DA30	257	263	999	999	174	180	999	999	308	317	999	999	253	261	277	999	230	254	999	999	282	288	292	296	204	207	210	999	202	206	214	999	181	999	999	999	189	218	257	999	289	292	295	999	364	366	418	999
[truncated: 12 more columns]
